# Supplementary material for: Clamping, bending, and twisting inter-domain motions in the misfold-recognizing portion of UDP-glucose: Glycoprotein glucosyltransferase
Source: PubMed Central journal article supplement (PMC8024514; doi:10.1016/j.str.2020.11.017), 2021-04-01
Supplement: mmc1.pdf [file mmc1.pdf]

**Structure, Volume 29**

**Supplemental Information**

**Clamping, bending, and twisting inter-domain**

**motions in the misfold-recognizing portion**

**of UDP-glucose: Glycoprotein glucosyltransferase**

**Carlos P. Modenutti, Juan I. Blanco Capurro, Roberta Ibba, Dominic S. Alonzi, Mauro N. Song, Snežana Vasiljević, Abhinav Kumar, Anu V. Chandran, Gabor Tax, Lucia Marti, Johan C. Hill, Andrea Lia, Mario Hensen, Thomas Waksman, Jonathan Rushton, Simone Rubichi, Angelo Santino, Marcelo A. Martí, Nicole Zitzmann, and Pietro Roversi**

## Supplementary Information Figures and Tables

**Clamping, bending, and twisting inter-domain motions in the misfold-recognising portion of UDP-glucose:glycoprotein glucosyl-transferase.**

**Carlos P. Modenutti<sup>1,2,¶</sup>, Juan I. Blanco Capurro<sup>1,2,¶</sup>, Roberta Ibba<sup>3,4,¶</sup>, Dominic S. Alonzi<sup>3</sup>, Mauro N. Song<sup>1,2</sup>, Snežana Vasiljević<sup>3</sup>, Abhinav Kumar<sup>3</sup>, Anu V. Chandran<sup>3</sup>, Gabor Tax<sup>5</sup>, Lucia Marti<sup>6</sup>, Johan C. Hill<sup>3</sup>, Andrea Lia<sup>3,5,6</sup>, Mario Hensen<sup>3</sup>, Thomas Waksman<sup>3</sup>, Jonathan Rushton<sup>3</sup>, Simone Rubichi<sup>3,6</sup>, Angelo Santino<sup>6</sup>, Marcelo A. Martí<sup>1,2,\*</sup>, Nicole Zitzmann<sup>3,\*</sup> and Pietro Roversi<sup>3,5,\*</sup>.**

1 Departamento de Química Biológica, Facultad de Ciencias Exactas y Naturales, Universidad de Buenos Aires, Ciudad Universitaria, Pab. II (CE1428EHA), Buenos Aires, Argentina

2 Instituto de Química Biológica de la Facultad de Ciencias Exactas y Naturales (IQUIBICEN) CONICET. Ciudad Universitaria, Pab. II (CE1428EHA), Buenos Aires, Argentina

3 Oxford Glycobiology Institute, Department of Biochemistry, University of Oxford, Oxford OX1 3QU, England, United Kingdom

4 Dipartimento di Chimica e Farmacia, Università degli Studi di Sassari, Via Muroni 23A, 07100 Sassari, SS, Italy

5 Leicester Institute of Structural and Chemical Biology, Department of Molecular and Cell Biology, University of Leicester, Henry Wellcome Building, Lancaster Road, Leicester, LE1 7RH, England, United Kingdom

6 Institute of Sciences of Food Production, C.N.R. Unit of Lecce, via Monteroni, I-73100 Lecce, Italy

¶ These authors contributed equally to this work

\* Correspondence: [marti.marcelo@gmail.com](mailto:marti.marcelo@gmail.com) (M.A.M.), [nicole.zitzmann@bioch.ox.ac.uk](mailto:nicole.zitzmann@bioch.ox.ac.uk) (N.Z.) and [pr159@leicester.ac.uk](mailto:pr159@leicester.ac.uk) (P.R.)

Supplementary Information Figures

Figure S1. Sequence conservation and HDX-MS deuterium uptake at the interface of the GT24 and  $\beta$ S1- $\beta$ S2 domains, related to Figure 2A.

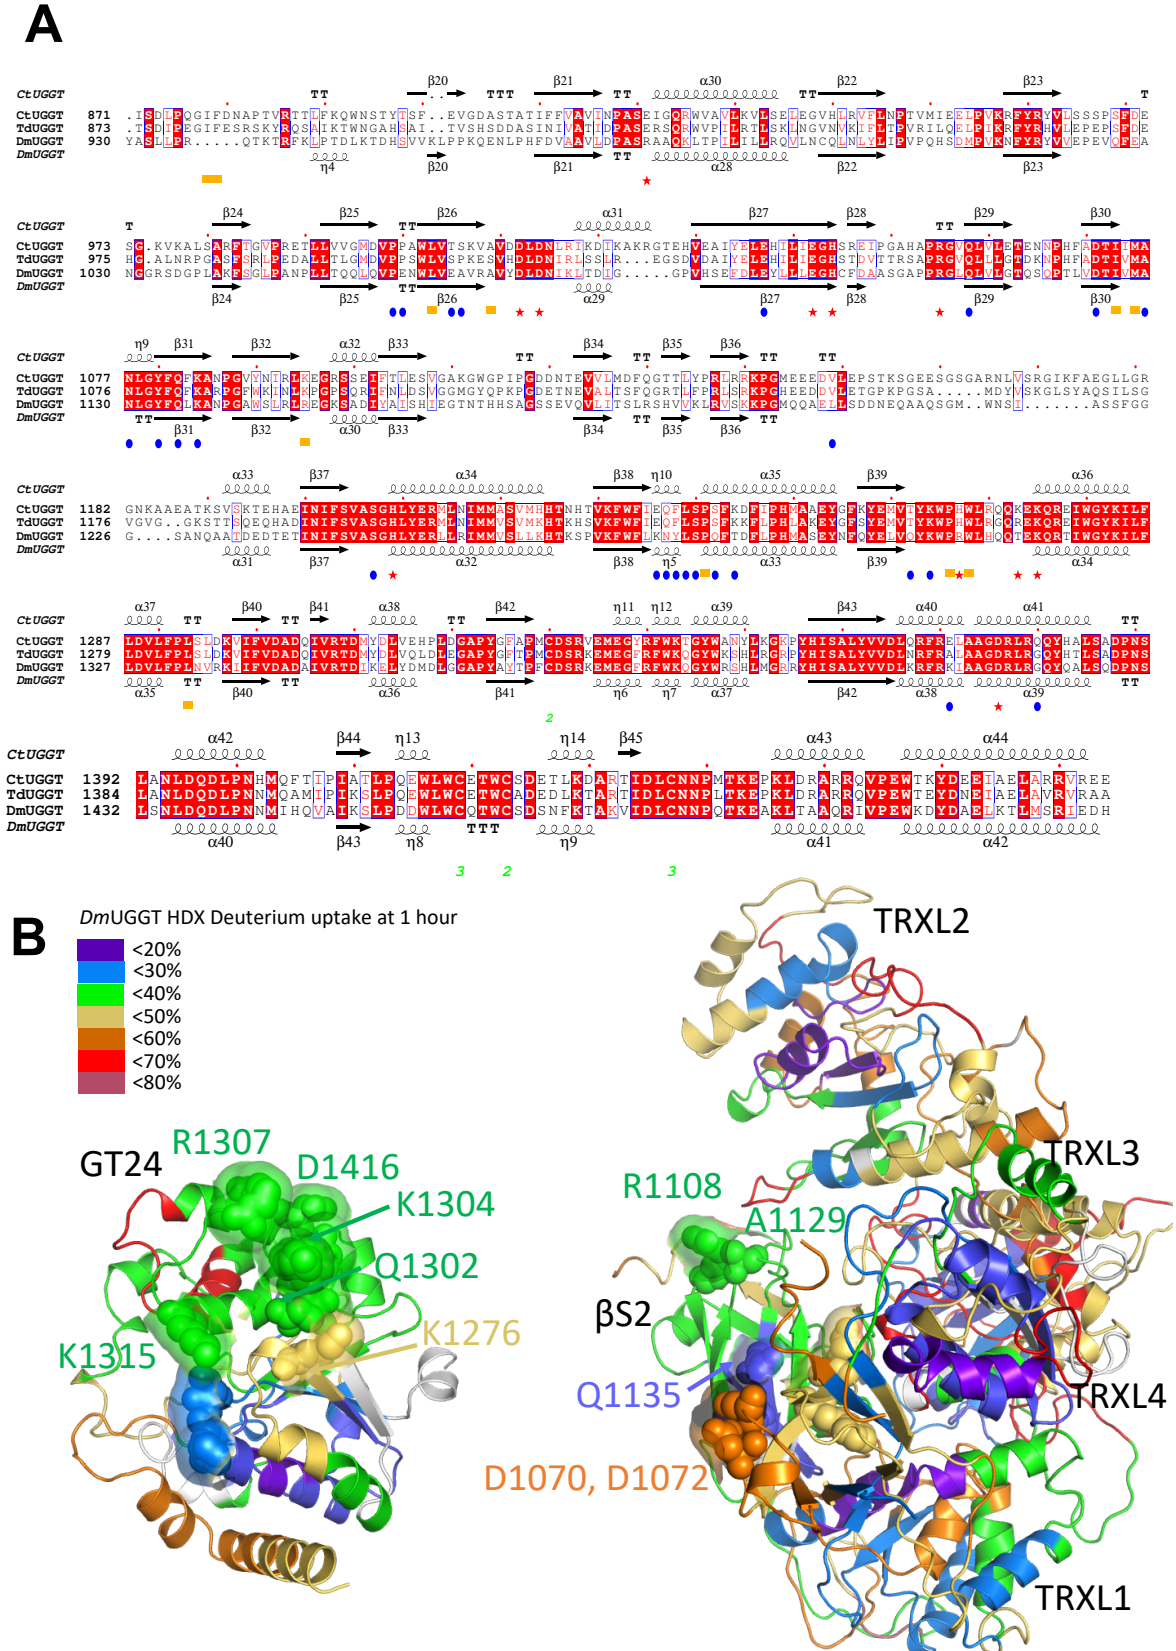

**Figure S2. Fitting of full-length *Td*UGGT and Fab models in the negative-stain EM map for the complex of *Td*UGGT and an anti-*Td*UGGT Fab, related to Figure 2A.**

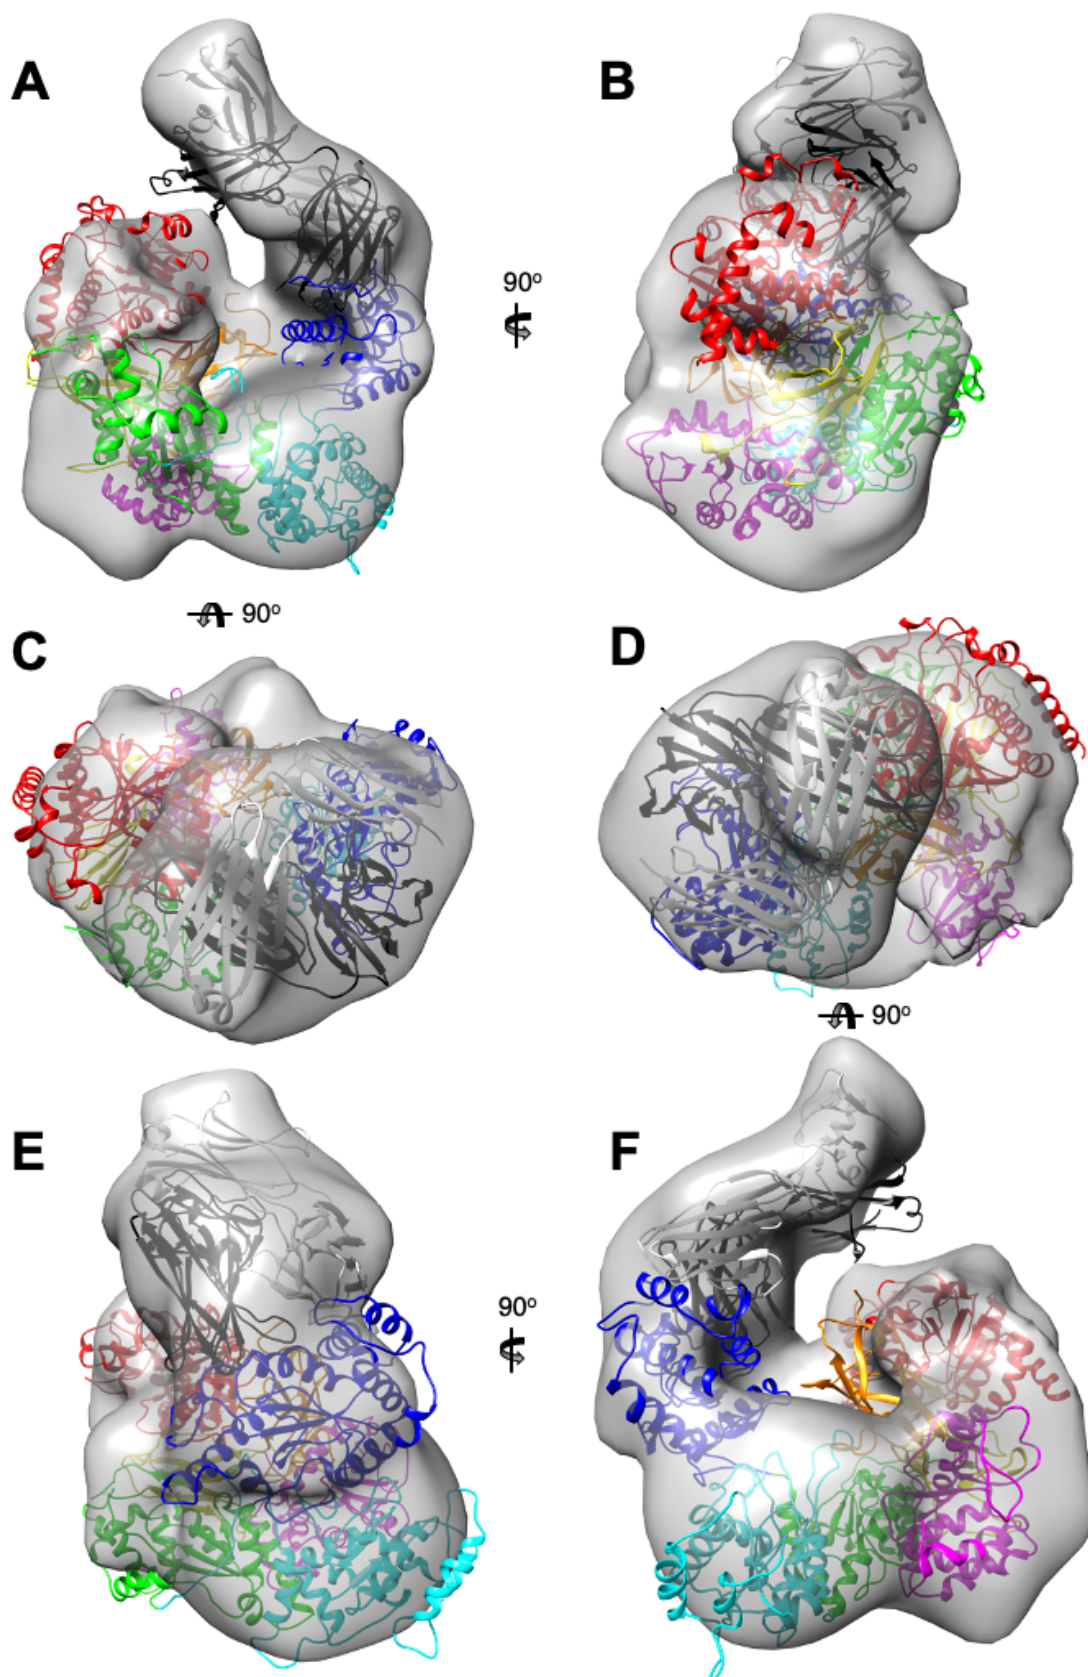

**Figure S3. Projections of individual MD trajectories for CtUGGT double Cysteine mutants onto the full conformational landscape of the wild type enzyme, coloured as a function of time, related to Figure 3.**

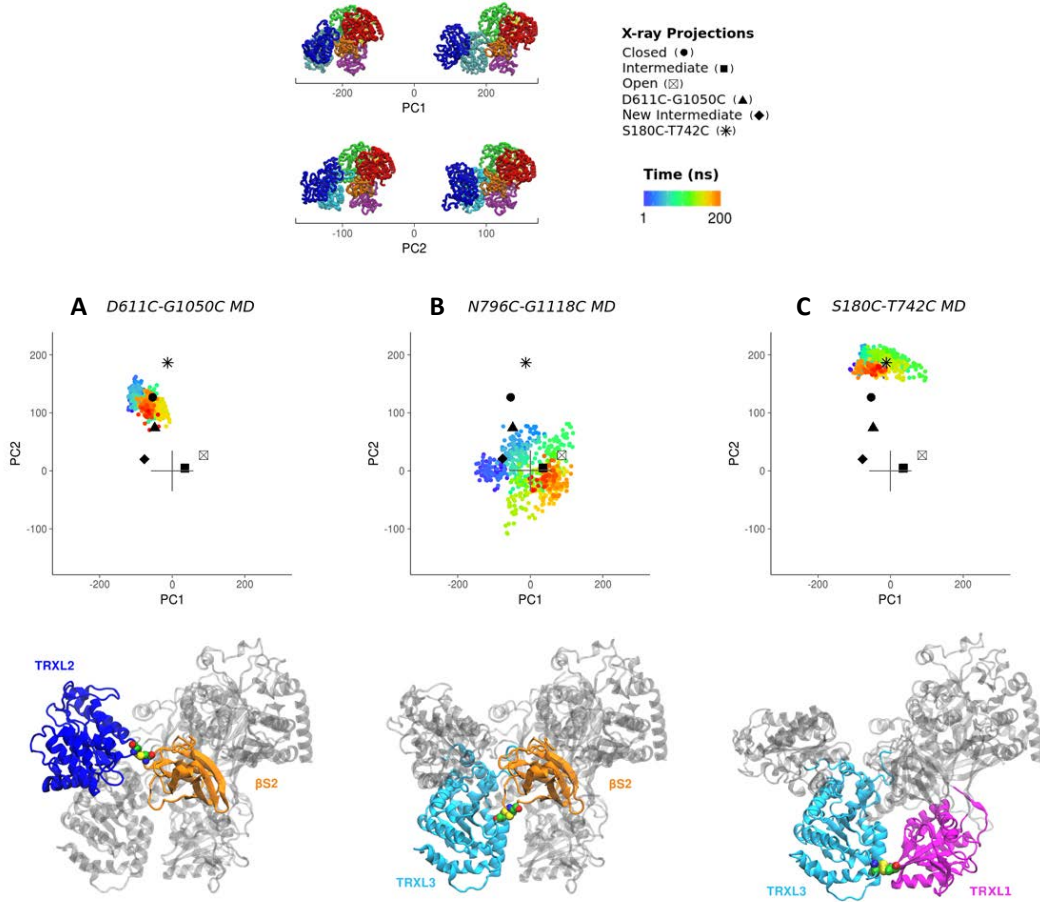

**Figure S4. Mass spectrometry of tryptic peptides confirms the disulfides in the C $\alpha$ UGGT double Cys mutants C $\alpha$ UGGT<sup>G177C/A786C</sup>, C $\alpha$ UGGT<sup>G179C/T742C</sup> and C $\alpha$ UGGT<sup>S180C/T742C</sup>, related to Figure 6.**

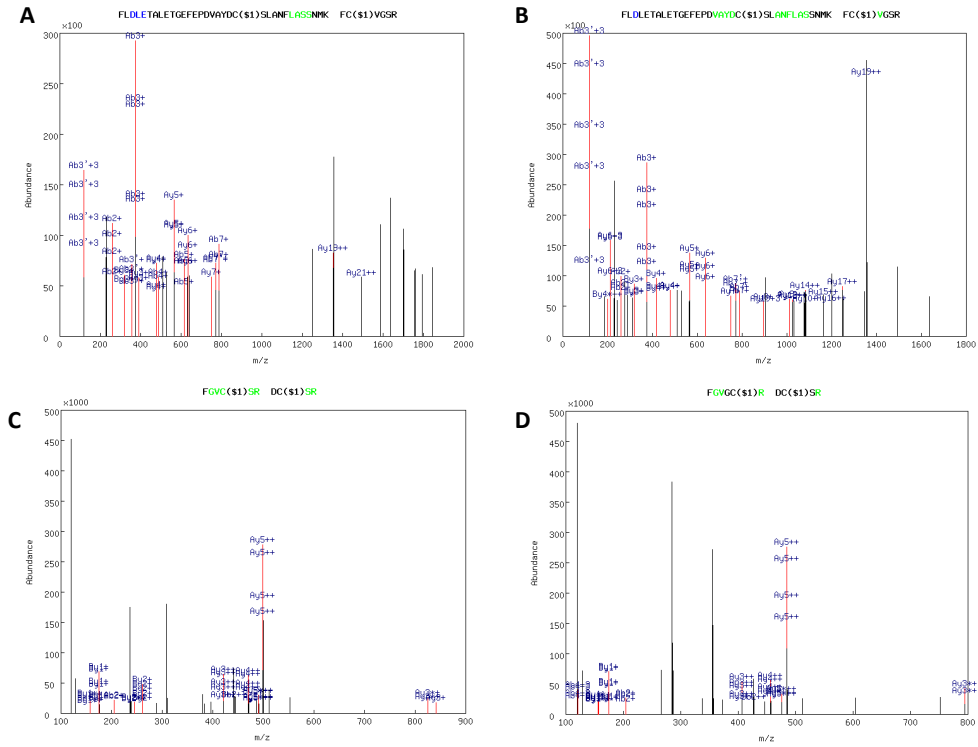

**SI Appendix Tables.****Table S1. *In vitro* UGGT substrates, related to Figure 4.**

List of various UGGT misfolded glycoprotein substrates described in the literature as UGGT substrates in *in vitro* experiments. No glycoproteins inferred to be UGGT substrates by *in cellula* experiments are included (see for example (Gardner and Kearse, 1999; Jin et al., 2007; Li et al., 2009; Pankow et al., 2015; Pearse et al., 2008)) nor glycoproteins that are *bona fide* UGGT substrates but whose structure has not been determined (Molinari et al., 2005; Trombetta et al., 1989)). (\*): structures are available only for the pro-glycoprotein (previous to protease cleavage)

| <b>Substrate</b>                                       | <b>PDB ID</b> | <b>Number of residues</b> | <b>Radius of Gyration (Å)</b> | <b>Reference</b>                                                         |
|--------------------------------------------------------|---------------|---------------------------|-------------------------------|--------------------------------------------------------------------------|
| <b><i>Crambe hispanica</i> crambin</b>                 | <b>1CRN</b>   | <b>46</b>                 | <b>9.7</b>                    | (Dedola et al., 2014)                                                    |
| <b><i>Hordeum vulgare</i> chymotrypsin inhibitor 2</b> | <b>2CI2</b>   | <b>64</b>                 | <b>11.4</b>                   | (Caramelo et al., 2003)                                                  |
| <b>Human interleukin 8 (IL-8)</b>                      | <b>1ICW</b>   | <b>72</b>                 | <b>12.5</b>                   | (Izumi et al., 2012)                                                     |
| <b>Human prosaposin A</b>                              | <b>5NXB</b>   | <b>87</b>                 | <b>N/A<sup>(*)</sup></b>      | (Pearse et al., 2010)                                                    |
| <b>Bovine RNase BS-prot</b>                            | <b>2E33</b>   | <b>104</b>                | <b>14.7</b>                   | (Ritter and Helenius, 2000; Ritter et al., 2005)                         |
| <b>Bovine RNase B</b>                                  | <b>2E33</b>   | <b>124</b>                | <b>14.3</b>                   | (Ritter et al., 2005; Ritter and Helenius, 2000; Sousa and Parodi, 1995) |
| <b><i>Staphylococcus aureus</i> nuclease</b>           | <b>1NUC</b>   | <b>149</b>                | <b>14.4</b>                   | (Ritter et al., 2005; Ritter and Helenius,                               |

UGGT inter-domain motions

|                                                     |             |            |                          |                               |
|-----------------------------------------------------|-------------|------------|--------------------------|-------------------------------|
|                                                     |             |            |                          | 2000; Sousa and Parodi, 1995) |
| <b><i>Trypanosoma cruzi</i> cruzipain</b>           | <b>3I06</b> | <b>215</b> | <b>N/A<sup>(*)</sup></b> | (Labriola et al., 1999)       |
| <b>Soybean agglutinin</b>                           | <b>4D69</b> | <b>234</b> | <b>16.9</b>              | (Keith et al., 2005)          |
| <b>Human alpha-galactosidase</b>                    | <b>3HG5</b> | <b>390</b> | <b>21.5</b>              | (Taylor et al., 2003)         |
| <b>Human exo-(1,3)-<math>\beta</math>-glucanase</b> | <b>1H4P</b> | <b>407</b> | <b>20.3</b>              | (Taylor et al., 2004)         |
| <b>Human transferrin</b>                            | <b>6D04</b> | <b>678</b> | <b>29.7</b>              | (Wada et al., 1997)           |



**Table S2. CtUGGT X-ray diffraction data collection statistics, related to STAR Methods section.**

| <b>CtUGGT Structure</b>            | <b>CtUGGT<sub>Kif</sub></b>                       | <b>ΔTRXL2</b>                    | <b>G177C/A786C</b>        | <b>S180C/T742C</b>         |
|------------------------------------|---------------------------------------------------|----------------------------------|---------------------------|----------------------------|
| <b>PDB ID</b>                      | 6TRF                                              | 6TS2                             | 6TS8                      | 6TRT                       |
| <b>Beamline, date</b>              | I03@DLS,<br>01.05.2016                            | I04@DLS,<br>13.01.2018           | I04@DLS,<br>08.10.2018    | I24@DLS,<br>08.08.2018     |
| <b>Space group (Z)</b>             | P2 <sub>1</sub> 2 <sub>1</sub> 2 <sub>1</sub> (4) | P2 <sub>1</sub> (8)              | P4 <sub>3</sub> (8)       | P3 <sub>2</sub> 12 (6)     |
| <b>Wavelength (Å)</b>              | 0.97630                                           | 0.97950                          | 0.97949                   | 0.96861                    |
| <b>Cell dimensions a, b, c (Å)</b> | a=78.65,<br>b=148.93,<br>c=190.30                 | a=151.14<br>b=191.01<br>c=158.81 | a=b=139.05<br>c=176.09    | a=b=148.80<br>c=235.55     |
| <b>α, β, γ (°)</b>                 | α=90.0,<br>β=90.0, γ=90.0                         | α=90.0,<br>β=117.,<br>γ=90.0     | α=90.0,<br>β=90.0, γ=90.0 | α=90.0,<br>β=90.0, γ=120.0 |
| <b>Resolution range (Å)</b>        | 95.15-4.11 (4.49-4.11)                            | 140.61-5.74 (6.15-5.74)          | 139.05-4.59 (5.32-4.59)   | 128.86-4.58 (5.13-4.58)    |
| <b>R<sub>merge</sub></b>           | 0.149 (3.268)                                     | 0.150 (1.432)                    | 0.275 (1.347)             | 0.118 (1.563)              |
| <b>R<sub>meas</sub></b>            | 0.157 (3.376)                                     | 0.189 (2.146)                    | 0.299 (1.453)             | 0.125 (1.650)              |
| <b>CC<sub>1/2</sub></b>            | 0.997 (0.566)                                     | 0.994 (0.382)                    | 0.991 (0.436)             | 0.995 (0.411)              |
| <b>I / σ(I)</b>                    | 9.9 (1.3)                                         | 3.6 (1.3)                        | 5.5 (1.5)                 | 10.6 (1.6)                 |
| <b>Completeness (%)</b>            | 90.2 (74.2)                                       | 91.5 (52.6)                      | 87.8 (77.8)               | 90.1 (83.0)                |
| <b>Redundancy</b>                  | 10.9 (15.9)                                       | 5.6 (6.0)                        | 6.7 (7.1)                 | 8.9 (9.8)                  |

**Table S3. CtUGGT crystal structures, refinement statistics, related to STAR Methods section.**

| <b>Crystal form</b>                                      | <b>CtUGGT<sub>Kif</sub></b>                       | <b>ΔTRXL2</b>            | <b>G177C/A786C</b>       | <b>S180C/T742C</b>       |
|----------------------------------------------------------|---------------------------------------------------|--------------------------|--------------------------|--------------------------|
| <b>PDB ID</b>                                            | 6TRF                                              | 6TS2                     | 6TS8                     | 6TRT                     |
| <b>Space group (Z)</b>                                   | P2 <sub>1</sub> 2 <sub>1</sub> 2 <sub>1</sub> (4) | P2 <sub>1</sub> (8)      | P4 <sub>3</sub> (8)      | P3 <sub>2</sub> 12 (6)   |
| <b>Resolution (Å)</b>                                    | 95.1-4.1<br>(4.6-4.1)                             | 140.6-5.7<br>(6.0-5.7)   | 139.0-4.6<br>(4.7-4.6)   | 128.9-4.6<br>(5.1-4.6)   |
| <b>No. reflections</b>                                   | 7,503 (442)                                       | 17,358 (424)             | 5,723 (23)               | 9,528 (477)              |
| <b><i>R</i><sub>work</sub> / <i>R</i><sub>free</sub></b> | 0.25/0.31<br>(0.26/0.22)                          | 0.17/0.24<br>(0.22/0.33) | 0.20/0.23<br>(0.18/0.23) | 0.29/0.30<br>(0.25/0.26) |
| <b>Atoms</b>                                             | 10,717                                            | 35,718                   | 20,112                   | 11,210                   |
| <b>&lt;B-factor&gt; (Å<sup>2</sup>)</b>                  | 270                                               | 134                      | 173                      | 143                      |
| <b>Rmsd<sub>bonds</sub>(Å)</b>                           | 0.006                                             | 0.009                    | 0.01                     | 0.006                    |
| <b>Rmsd<sub>angles</sub> (°)</b>                         | 0.95                                              | 1.07                     | 1.59                     | 0.99                     |
| <b>Ramachandran<br/>outliers</b>                         | 17/1309<br>(1.3%)                                 | 87/4431<br>(2.0%)        | 15/1285<br>(1.2%)        | 14/1363<br>(1.0%)        |
| <b>Ramachandran<br/>allowed</b>                          | 1292/1309<br>(98.7%)                              | 4344/4431<br>(98.0%)     | 2392/2492<br>(96.0%)     | 1349/1363<br>(99.0%)     |
| <b>Ramachandran<br/>favoured</b>                         | 1235/1309<br>(94.3%)                              | 3934/4431<br>(88.8%)     | 1977/2492<br>(79.3%)     | 1284/1363<br>(94.2%)     |

All structures were refined against X-ray data from one crystal only. Values in parentheses are for highest-resolution shell.

**Table S4. Oligonucleotides , related to STAR Methods section.**

| Label                  | Sequence                                          | Reference                 | Notes                                                             |
|------------------------|---------------------------------------------------|---------------------------|-------------------------------------------------------------------|
| CtUGGT_pHLsec_F primer | 5'-GGTTGCGTAGCTGAAA<br>CCGGTCAAGTCGCAGCCTCTCCA-3' | (Roversi et al.,<br>2017) | Primer for Gibson Assembly                                        |
| CtUGGT_pHLsec_R primer | 5'-GATGGTGGTGCTTGGTACCC<br>TCCCGAACCGTCTTGAC-3'   | (Roversi et al.,<br>2017) | Primer for Gibson Assembly                                        |
| Δ1_F primer            | 5'-GAGTCTCTGTCCGTCAATGG-3'                        | This manuscript           | Primer for mutagenesis to obtain CtUGGT_ΔTRXL1                    |
| Δ1_R primer            | 5'-AGAGGGGAAAGCGGCTTT-3'                          | This manuscript           | Primer for mutagenesis to obtain CtUGGT_ΔTRXL1                    |
| Δ2_F primer            | 5'-GCCCTATCAAGACGGAAC-3'                          | This manuscript           | Primer for mutagenesis to obtain CtUGGT_ΔTRXL2                    |
| Δ2_R primer            | 5'-AAATCTCCGGGGCTCGTC-3'                          | This manuscript           | Primer for mutagenesis to obtain CtUGGT_ΔTRXL2                    |
| Δ3_F primer            | 5'-ATTTCCGGATCTCCACAG-3'                          | This manuscript           | Primer for mutagenesis to obtain CtUGGT_ΔTRXL3                    |
| Δ3_R primer            | 5'-GTTCTTGTCTTCGGGGAAAATG-3'                      | This manuscript           | Primer for mutagenesis to obtain CtUGGT_ΔTRXL3                    |
| G177C_F primer         | 5'-TCGGAAGTTTtgcGTTGGTCCC-3'                      | This manuscript           | Primer for mutagenesis to obtain CtUGGT <sup>G177C</sup> mutation |
| G177C_R primer         | 5'-TCAAATGGCAGTGCCGC-3'                           | This manuscript           | Primer for mutagenesis to obtain CtUGGT <sup>G177C</sup> mutation |
| V178C_F primer         | 5'-GAAGTTTGGCtgtGGTCCCGTG-3'                      | This manuscript           | Primer for mutagenesis to obtain CtUGGT <sup>V178C</sup> mutation |
| V178C_R primer         | 5'-CGATCAAATGGCAGTGTC-3'                          | This manuscript           | Primer for mutagenesis to obtain CtUGGT <sup>V178C</sup> mutation |
| S180C_F primer         | 5'-TGGCGTTGGTtgcCGTGATGTGA-3'                     | This manuscript           | Primer for mutagenesis to obtain CtUGGT <sup>S180C</sup> mutation |
| S180C_R primer         | 5'-AACTTCCGATCAAATGGCAGTGTC-3'                    | This manuscript           | Primer for mutagenesis to obtain CtUGGT <sup>S180C</sup> mutation |
| T742C_F primer         | 5'-TCCCAAGGATtgcTCACGTTCCC-3'                     | This manuscript           | Primer for mutagenesis to obtain CtUGGT <sup>T742C</sup> mutation |
| T742C_R primer         | 5'-TTGTGGACAATGTCCAAC-3'                          | This manuscript           | Primer for mutagenesis to obtain CtUGGT <sup>T742C</sup> mutation |
| A786C_F primer         | 5'-CGCTTACGActgtTCTCTAGCCAAC-3'                   | This manuscript           | Primer for mutagenesis to obtain CtUGGT <sup>A786C</sup> mutation |
| A786C_R primer         | 5'-ACATCTGGTTCGAACTCG-3'                          | This manuscript           | Primer for mutagenesis to obtain CtUGGT <sup>A786C</sup> mutation |

## Supplementary Information Figures Titles and Legends

### Figure S1. Sequence conservation and HDX-MS deuterium uptake at the interface of the GT24 and $\beta$ S1- $\beta$ S2 domains, related to Figure 2A.

(A) The C-terminal parts of the sequences of *Ct*UGGT, *Td*UGGT and *Dm*UGGT (centred around the residues in the GT24: $\beta$ S1- $\beta$ S2 interface) are aligned and the conserved residues shown in white text over red squares. Similar residues are in red text over white squares with blue edges. Disulphide bonds are labelled in green under the Cys residues. The *Ct*UGGT (*Dm*UGGT) secondary structure is indicated above (below) its sequence. Blue dots: residues whose side chains are forming hydrogen bonds across the GT24: $\beta$ S1- $\beta$ S2 domains interface. Red stars: residues whose side chains are forming salt bridges across the GT24: $\beta$ S1- $\beta$ S2 domains interface. Orange squares: residues whose side chains are forming hydrophobic interactions across the GT24: $\beta$ S1- $\beta$ S2 domains interface. The sequences were aligned using Clustal Omega (Sievers and Higgins, 2018). The figure has been made using ESPript (Robert and Gouet, 2014);. (B) homology model of the *Drosophila melanogaster* UGGT (*Dm*UGGT), in cartoon representation; the GT24 domain has been split from the rest of the structure in order to expose the GT24: $\beta$ S1- $\beta$ S2 domains interface. The main residues in the same interface are in spheres and surface representation. The structure is coloured according to deuterium uptake at the 1 hour timepoint (Hydrogen Deuterium eXchange Mass Spectrometry (HDX-MS) data from (Calles-Garcia et al., 2017)), see legend in the inset.

### Figure S2. Fitting of full-length *Td*UGGT and Fab models in the negative-stain EM map for the complex of *Td*UGGT and an anti-*Td*UGGT Fab, related to Figure 2A.

The homology model for *Td*UGGT (residues 29-1466) was coloured as follows: TRXL1 (residues 40-219): magenta; TRXL2 (residues 413-657): blue; TRXL3 (residues 658-898): cyan; TRXL4 (residues 239-412; 899-958): green;  $\beta$ S1 (residues 29-39; 220-238; 959-1037): yellow;  $\beta$ S2 (residues 1038-1151): orange; GT24 (residues 1190-1466): red. A generic Fab structure was chosen for the fitting of the anti-*Td*UGGT Fab antibody fragment (PDB ID 1FGN, 214+214 residues, MW=46927 Dalton), painted black (heavy chain) and white (light chain). The 25 Å negative-stain EM map is contoured at a contour level appropriate for enclosing the mass of the *Td*UGGT plus a Fab fragment (i.e. about 356,800 Å<sup>3</sup> corresponding to a mass of 295,000 Dalton, based on a specific volume of 1.21 Å per Dalton (Harpaz et al., 1994)). (A), (B) and (C): three views of the *Td*UGGT and Fab models fitted in the original hand of the negative stain EM map (with B and C rotated by 90° with

respect to view A around the centre of mass of the model, along the vertical and horizontal direction, respectively); **(D)**, **(E)** and **(F)**: three views of the same *TdUGGT* and Fab models fitted to the inverse hand of the negative stain EM map (with E and F rotated by 90° with respect to view D around the centre of mass of the model, along the vertical and horizontal direction, respectively).

**Figure S3. Projections of individual MD trajectories for CtUGGT double Cysteine mutants onto the full conformational landscape of the wild type enzyme, coloured as a function of time, related to Figure 3.**

Upper panels show the projections of individual MD trajectories onto the full conformational landscape as described by the first and second PCs, coloured as a function of time. Domains coloured as in Figure S1. Lower panels show the structure of each mutant, with the mutated cysteine residues drawn in sphere representation and domains containing the mutation shown in colour, with the rest of the protein is in grey. **(A)** MD trajectory projection starting from the crystal structure of the *CtUGGT*<sup>D611C/G1050C</sup> mutant (PDB ID: 5NV4); **(B)** MD trajectory projection starting from the homology model of the *CtUGGT*<sup>N796C-G1118C</sup> mutant, generated using the closed X-ray structure as template and Modeller.; **(C)** MD trajectory projection starting from the crystal structure of the *CtUGGT*<sup>S180C/T742C</sup> mutant (PDB ID: 6TRT).

**Figure S4. Mass spectrometry of tryptic peptides confirms the disulfides in the CtUGGT double Cys mutants CtUGGT<sup>G177C/A786C</sup>, CtUGGT<sup>G179C/T742C</sup> and CtUGGT<sup>S180C/T742C</sup>, related to Figure 6.**

In peptide mass spectrometry, fragment ions that appear to extend from the amino- or carboxy-terminus of a peptide are termed “b” or “y” ions, respectively. **(A,B)** mass spectrometry detection of ions derived from fragmentation of the disulphide-bridged tryptic peptides <sup>766</sup>FLDLETALETGEFEPDVAYDCSLANFLASSNMK<sup>798</sup> and <sup>176</sup>FCVGSR<sup>181</sup> in the double mutant *CtUGGT*<sup>G177C/A786C</sup>. The ions confirm the establishment of the engineered disulphide bridge at positions 177-786 between the TRXL1 and TRXL3 domains. No peptides containing free Cys at either position 177 or 786 were detected; **(C)** mass spectrometry detection of ions derived from fragmentation of the disulphide-bridged tryptic peptides <sup>741</sup>DCSR<sup>744</sup> and <sup>176</sup>FGVCSR<sup>181</sup> in the double mutant *CtUGGT*<sup>G179C/T742C</sup>. The ions confirm the establishment of the engineered disulphide bridge at positions 179-742 between the TRXL1 and TRXL3 domains. No peptides containing free Cys at either position 179 or 742 were detected; **(D)** mass spectrometry detection of ions derived from fragmentation of the disulphide-bridged tryptic peptides <sup>741</sup>DCSR<sup>744</sup> and <sup>176</sup>FGVGCRDVILYADITS<sup>191</sup> in the double mutant *CtUGGT*<sup>S180C/T742C</sup>. The ions confirm the establishment of the engineered

disulphide bridge at positions 180-742 between the TRXL1 and TRXL3 domains. No peptides containing free Cys at either position 180 or 742 were detected.

## References

- Calles-Garcia, D., Yang, M., Soya, N., Melero, R., Ménade, M., Ito, Y., Vargas, J., Lukacs, G.L., Kollman, J.M., Kozlov, G., Gehring, K., 2017. Single-particle electron microscopy structure of UDP-glucose:glycoprotein glucosyltransferase suggests a selectivity mechanism for misfolded proteins. *J. Biol. Chem.* jbc.M117.789495. doi:10.1074/jbc.M117.789495
- Caramelo, J.J., Castro, O.A., Alonso, L.G., De Prat-Gay, G., Parodi, A.J., 2003. UDP-Glc:glycoprotein glucosyltransferase recognizes structured and solvent accessible hydrophobic patches in molten globule-like folding intermediates. *Proceedings of the National Academy of Sciences* 100, 86–91. doi:10.1073/pnas.262661199
- Dedola, S., Izumi, M., Makimura, Y., Seko, A., Kanamori, A., Sakono, M., Ito, Y., Kajihara, Y., 2014. Folding of Synthetic Homogeneous Glycoproteins in the Presence of a Glycoprotein Folding Sensor Enzyme. *Angew. Chem. Int. Ed.* 53, 2883–2887. doi:10.1002/anie.201309665
- Gardner, T.G., Kears, K.P., 1999. Modification of the T cell antigen receptor (TCR) complex by UDP-glucose:glycoprotein glucosyltransferase. TCR folding is finalized convergent with formation of alpha beta delta epsilon gamma epsilon complexes. *Journal of Biological Chemistry* 274, 14094–14099.
- Harpaz, Y., Gerstein, M., Chothia, C., 1994. Volume changes on protein folding. *Structure/Folding and Design* 2, 641–649.
- Izumi, M., Makimura, Y., Dedola, S., Seko, A., Kanamori, A., Sakono, M., Ito, Y., Kajihara, Y., 2012. Chemical synthesis of intentionally misfolded homogeneous glycoprotein: a unique approach for the study of glycoprotein quality control. *J. Am. Chem. Soc.* 134, 7238–7241. doi:10.1021/ja3013177
- Jin, H., Yan, Z., Nam, K.H., Li, J., 2007. Allele-specific suppression of a defective brassinosteroid receptor reveals a physiological role of UGGT in ER quality control. *Molecular Cell* 26, 821–830. doi:10.1016/j.molcel.2007.05.015
- Keith, N., Parodi, A.J., Caramelo, J.J., 2005. Glycoprotein tertiary and quaternary structures are monitored by the same quality control mechanism. *Journal of Biological Chemistry* 280, 18138–18141. doi:10.1074/jbc.M501710200
- Labriola, C., Cazzulo, J.J., Parodi, A.J., 1999. Trypanosoma cruzi calreticulin is a lectin that binds monoglucosylated oligosaccharides but not protein moieties of glycoproteins. *Mol. Biol. Cell* 10, 1381–1394.
- Li, J., Zhao-Hui, C., Batoux, M., Nekrasov, V., Roux, M., Chinchilla, D., Zipfel, C., Jones, J.D.G., 2009. Specific ER quality control components required for biogenesis of the plant innate immune receptor EFR. *Proc. Natl. Acad. Sci. U.S.A.* 106, 15973–15978. doi:10.1073/pnas.0905532106
- Molinari, M., Galli, C., Vanoni, O., Arnold, S.M., Kaufman, R.J., 2005. Persistent glycoprotein misfolding activates the glucosidase II/UGT1-driven calnexin cycle to delay aggregation and loss of folding competence. *Molecular Cell* 20, 503–512. doi:10.1016/j.molcel.2005.09.027
- Pankow, S., Bamberger, C., Calzolari, D., Martínez-Bartolomé, S., Lavallée-Adam, M., Balch, W.E., Yates, J.R., 2015. ΔF508 CFTR interactome remodelling promotes rescue of cystic fibrosis. *Nature* 528, 510–516. doi:10.1038/nature15729
- Pearse, B.R., Gabriel, L., Wang, N., Hebert, D.N., 2008. A cell-based reglucosylation assay demonstrates the role of GT1 in the quality control of a maturing glycoprotein. *J. Cell Biol.* 181, 309–320. doi:10.1083/jcb.200712068

- Pearse, B.R., Tamura, T., Sunryd, J.C., Grabowski, G.A., Kaufman, R.J., Hebert, D.N., 2010. The role of UDP-Glc:glycoprotein glucosyltransferase 1 in the maturation of an obligate substrate prosaposin. *J. Cell Biol.* 189, 829–841. doi:10.1083/jcb.200912105
- Ritter, C., Helenius, A., 2000. Recognition of local glycoprotein misfolding by the ER folding sensor UDP-glucose:glycoprotein glucosyltransferase. *Nat. Struct. Biol.* 7, 278–280. doi:10.1038/74035
- Ritter, C., Quirin, K., Kowarik, M., Helenius, A., 2005. Minor folding defects trigger local modification of glycoproteins by the ER folding sensor GT. *The EMBO Journal* 24, 1730–1738. doi:10.1038/sj.emboj.7600645
- Robert, X., Gouet, P., 2014. Deciphering key features in protein structures with the new ENDscript server. *Nucleic Acids Res.* 42, W320–4. doi:10.1093/nar/gku316
- Roversi, P., Marti, L., Caputo, A.T., Alonzi, D.S., Hill, J.C., Dent, K.C., Kumar, A., Levasseur, M.D., Lia, A., Waksman, T., Basu, S., Soto Albrecht, Y., Qian, K., Mclvor, J.P., Lipp, C.B., Siliqi, D., Vasiljević, S., Mohammed, S., Lukacik, P., Walsh, M.A., Santino, A., Zitzmann, N., 2017. Interdomain conformational flexibility underpins the activity of UGGT, the eukaryotic glycoprotein secretion checkpoint. *Proc. Natl. Acad. Sci. U.S.A.* 114, 8544–8549. doi:10.1073/pnas.1703682114
- Sievers, F., Higgins, D.G., 2018. Clustal Omega for making accurate alignments of many protein sequences. *Protein Sci.* 27, 135–145. doi:10.1002/pro.3290
- Sousa, M., Parodi, A.J., 1995. The molecular basis for the recognition of misfolded glycoproteins by the UDP-Glc:glycoprotein glucosyltransferase. *The EMBO Journal* 14, 4196–4203.
- Taylor, S.C., Ferguson, A.D., Bergeron, J.J.M., Thomas, D.Y., 2004. The ER protein folding sensor UDP-glucose glycoprotein–glucosyltransferase modifies substrates distant to local changes in glycoprotein conformation. *Nat Struct Mol Biol* 11, 128–134. doi:10.1038/nsmb715
- Taylor, S.C., Thibault, P., Tessier, D.C., Bergeron, J.J.M., Thomas, D.Y., 2003. Glycopeptide specificity of the secretory protein folding sensor UDP-glucose glycoprotein:glucosyltransferase. *EMBO reports* 4, 405–411. doi:10.1038/sj.embor.embor797
- Trombetta, S.E., Bosch, M., Parodi, A.J., 1989. Glucosylation of glycoproteins by mammalian, plant, fungal, and trypanosomatid protozoa microsomal membranes. *Biochemistry* 28, 8108–8116.
- Wada, I., Kai, M., Imai, S., Sakane, F., Kanoh, H., 1997. Promotion of transferrin folding by cyclic interactions with calnexin and calreticulin. *The EMBO Journal* 16, 5420–5432. doi:10.1093/emboj/16.17.5420
